# Supplementary material for: Energy comparison of sequential and integrated CO2 capture and electrochemical conversion
Source: PubMed Central journal article supplement (PMC9474516; doi:10.1038/s41467-022-33145-8), 2022-09-14
Supplement: 41467_2022_33145_MOESM1_ESM.pdf [file 41467_2022_33145_MOESM1_ESM.pdf]

# Supplementary Information

## Energy comparison of sequential and integrated CO<sub>2</sub> capture and electrochemical conversion

Mengran Li<sup>1</sup>, Erdem Irtem<sup>1</sup>, Hugo-Pieter Iglesias van Montfort<sup>1</sup>, Maryam Abdinejad<sup>1</sup>, Thomas Burdyny\*<sup>1</sup>

Materials for Energy Conversion and Storage (MECS), Department of Chemical Engineering, the Delft University of Technology, van der Maasweg 9, 2629 HZ Delft, The Netherlands.

Corresponding author: [t.e.burdyny@tudelft.nl](mailto:t.e.burdyny@tudelft.nl)

## Supplementary note 1

### Estimation of energy consumption for the integrated electrolyser

A summary of variables definition and values for the equations below are given in Supplementary Table 1.

#### *Anode potential*

We assumed the anode reaction for the gas-fed electrolyser is to evolve oxygen from water in a basic environment (1 M KOH aqueous solution, pH = 14). The anode's overpotential is the same as the gas-fed CO<sub>2</sub> electrolysis process. The charge-transfer reactions at the anode can be described by the Tafel equation when the anode overpotential is larger than 200 mV:

$$j = j_o \times \left(\frac{c}{c^{ref}}\right)^{\gamma} \times \exp\left(\frac{\alpha_a z_o F}{RT} \times \eta\right) \quad (1)$$

The overall anode potential can be calculated by:

$$E_{anode} = U + \eta \quad (2)$$

#### *Ohmic loss*

We assumed the electrode is far more electronically conductive than the membrane and electrolytes. The ohmic losses should be a sum of resistances at the ion-exchange membrane, catholyte and anolyte. The ohmic area specific resistance of the membrane or electrolytes can be determined by:

$$ASR_k = \frac{1}{\sigma_k} \times L_k \quad (3)$$

The ohmic loss can be estimated by:

$$\eta_{ohm} = \sum_k ASR_k \times j \quad (4)$$

Supplementary Figure 1 shows a sum of our estimated anode potential and ohmic loss based on our assumptions. (see Supplementary Table 1)

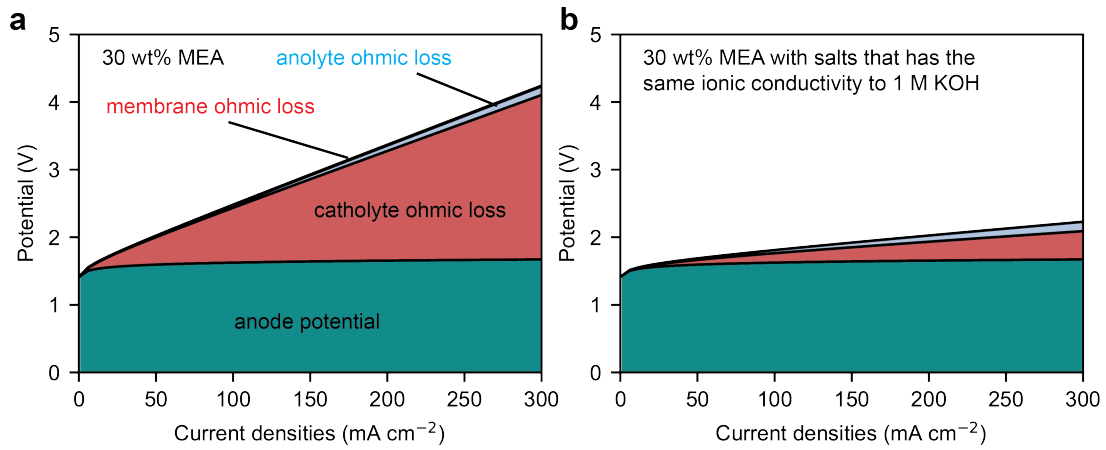

**Supplementary Figure 1 Relation between current densities and potentials (without cathode potential) for the integrated CO<sub>2</sub> electrolyser with (a) 30 wt% monoethanolamine solution as the catholyte and (b) 30 wt% monoethanolamine solution with inorganic salts as the catholyte that has the same ionic conductivity (21.5 S m<sup>-1</sup>) for the 1 M KOH.**

The overall cell voltage can be estimated by:

$$E_{cell} = E_{anode} - E_{cathode} + \eta_{ohm} \quad (5)$$

The cathode potentials were extracted from literature data summarized in Supplementary Table 2. The Nernstian overpotential, defined as the potential related to the pH differences at cathode and anode, was not considered in this work.

The energy consumed to convert 1 mol CO<sub>2</sub> to CO electrochemically can be calculated by:

$$Q = \frac{E_{cell} \times j \times z \times F}{FE_{CO} \times j} \quad (6)$$

#### Estimation of energy consumption for gas-fed CO<sub>2</sub> electrolyser

We estimated the energy consumption by using the Eq.1-7, where the cell voltages were reported in recent literature, summarized in Supplementary Table 3.

**Supplementary Table 1 Summary of variables definition and values for supplementary note 1**

| Variables                               | Description                                                                                                                                                              | Value and/or unit                                                                                                                                                                                                           |
|-----------------------------------------|--------------------------------------------------------------------------------------------------------------------------------------------------------------------------|-----------------------------------------------------------------------------------------------------------------------------------------------------------------------------------------------------------------------------|
| $j$                                     | Current density (mA cm <sup>-2</sup> )                                                                                                                                   | -                                                                                                                                                                                                                           |
| $j_o$                                   | Exchange current density (mA <sup>-2</sup> )                                                                                                                             | 0.01 mA cm <sup>-2</sup> Ref[1]                                                                                                                                                                                             |
| $\left(\frac{c}{c_{ref}}\right)^\gamma$ | Concentration-related terms, where $c$ is concentration of OH <sup>-</sup> to be oxidized, and $c_{ref}$ is the reference concentration, $\gamma$ is the reaction order. | In 1 M KOH aqueous anolyte, this ratio is unity. <sup>2-5</sup>                                                                                                                                                             |
| $\alpha_a$                              | Anode charge transfer coefficient                                                                                                                                        | 0.6 Ref[1]                                                                                                                                                                                                                  |
| $z_o$                                   | The number of charge to produce one oxygen molecule                                                                                                                      | 4                                                                                                                                                                                                                           |
| $F$                                     | Faraday constant                                                                                                                                                         | 96485 s A mol <sup>-1</sup>                                                                                                                                                                                                 |
| $R$                                     | Gas constant                                                                                                                                                             | 8.314 J mol <sup>-1</sup> K <sup>-1</sup>                                                                                                                                                                                   |
| $T$                                     | Temperature                                                                                                                                                              | 273 K                                                                                                                                                                                                                       |
| $\eta$                                  | Overpotential of anode                                                                                                                                                   | V                                                                                                                                                                                                                           |
| $A$                                     | Pre-exponential factor                                                                                                                                                   | 1.23×10 <sup>-4</sup> mA cm <sup>-2</sup> 2-5                                                                                                                                                                               |
| $E_a$                                   | Apparent activation energy                                                                                                                                               | 25 kJ mol <sup>-1</sup> 2-5                                                                                                                                                                                                 |
| $E_{anode}$                             | Anode potential                                                                                                                                                          | V vs SHE                                                                                                                                                                                                                    |
| $U$                                     | Equilibrium potential                                                                                                                                                    | 1.23 V vs. SHE                                                                                                                                                                                                              |
| $ASR_k$                                 | Area specific ohmic resistance of $k$ component (catholyte, anolyte or Nafion membrane)                                                                                  | Ω cm <sup>2</sup>                                                                                                                                                                                                           |
| $\sigma_k$                              | Electrical conductivity of the $k$ component at 25 °C                                                                                                                    | 30 wt% MEA (5 M) has an ion conductivity of 3.7 S m <sup>-1</sup> ; Ref[6]<br>1 M KOH has an ion conductivity of 21.53 S·m <sup>-1</sup> Ref[7]<br>Nafion membrane conductivity is assumed to be 8 S m <sup>-1</sup> Ref[8] |
| $L_k$                                   | The length of the ion transport of component $k$                                                                                                                         | Ion transport length in anolyte was assumed to be 1 mm;<br>Ion transport length in catholyte was assumed to be 3 mm;<br>Thickness of the Nafion 115 is 115 μm.                                                              |

|               |                                                                            |                            |
|---------------|----------------------------------------------------------------------------|----------------------------|
| $\eta_{ohm}$  | Ohmic loss                                                                 | V                          |
| $E_{cell}$    | Cell voltage                                                               | V                          |
| $E_{cathode}$ | Cathode potential                                                          | V vs. RHE                  |
| $Q$           | Energy convert n to convert 1 mol CO <sub>2</sub> to CO                    | kJ per mol CO <sub>2</sub> |
| $FE_{CO}$     | Faradaic efficiency of CO                                                  | %                          |
| $z$           | The number of electrons to produce single CO molecule from CO <sub>2</sub> | 2                          |

**Supplementary Table 2 Summary of recent reports on electrochemical CO<sub>2</sub> reduction directly from concentrated amine solutions**

| <b>Cathode</b>                             | <b>Cathode Potential (V) vs. RHE</b> | <b>FE<sub>CO</sub> (%)</b> | <b>Current densities (mA cm<sup>-2</sup>)</b> | <b>Solvents</b>                                                         | <b>Ref</b> |
|--------------------------------------------|--------------------------------------|----------------------------|-----------------------------------------------|-------------------------------------------------------------------------|------------|
| Ag/carbon-black on 300 nm Ag film on ePTFE | -0.8                                 | 72                         | 50                                            | 30wt% MEA mixed with 2M KCl with no dissolved CO <sub>2</sub>           | 9          |
| Ag/carbon-black on 300 nm Ag film on ePTFE | -1.2                                 | 20                         | 100                                           | 30 % wt. MEA mixed no dissolved CO <sub>2</sub>                         | 9          |
| Ag foil                                    | -0.8                                 | 12.4                       | 10*                                           | 30 wt% MEA                                                              | 10         |
| Ag foil                                    | -1.1                                 | 6.1                        | 10*                                           | 30 wt% MEA                                                              | 10         |
| Ag foil                                    | -1.3                                 | 2.3                        | 10*                                           | 30 wt% MEA                                                              | 10         |
| Ag foil                                    | -0.8                                 | 33.4                       | 10*                                           | 30wt% MEA with 0.1% wt/wt CTAB                                          | 10         |
| Ag foil                                    | -1.1                                 | 15.9                       | 10*                                           | MEA with 0.1% wt/wt CTAB                                                | 10         |
| Ag foil                                    | -1.3                                 | 9.2                        | 10*                                           | 30wt% MEA with 0.1% wt/wt CTAB                                          | 10         |
| Cu                                         | -0.78                                | 45                         | 18.4                                          | 0.1mM ethylenediamine carbamate in 0.1M NaClO <sub>4</sub>              | 11         |
| Smooth Au foil                             | -1.9 vs. Ag AgCl                     | 45                         | 15                                            | 2-amino-2-methyl-1-propanol (AMP) and propylene carbonate (PC) solution | 12         |

|              |       |    |     |                                                                                                      |    |
|--------------|-------|----|-----|------------------------------------------------------------------------------------------------------|----|
| Au/MgAl-LDHs | -0.4  | 68 | 0.8 | 1.0 M alcohol amine solution<br>(n(ethanolamine):<br>n(diethanolamine) = 2:3)                        | 13 |
| Cu/MgAl-LDHs | -0.25 | 73 | 0.4 | 1.0 M alcohol amine<br>solution(n(ethanolamine):<br>n(diethanolamine) = 2:3)                         | 13 |
| Ag           | -1.1  | 71 | 15  | [MEAHC][MDEA], where<br>MEAHC is ethanolamine<br>hydrochloride, and MDEA is<br>methyl diethanolamine | 14 |

\* These values are our estimations because the original paper did not report the exact values.

### Supplementary Table 3 Summary of examples of normal CO<sub>2</sub> electrolysis to produce CO.

| Cathode                                 | Cathode Potential (V) vs RHE | Cell Voltage (V) | FE <sub>CO</sub> (%) | Current densities (mA cm <sup>-2</sup> ) | Ref |
|-----------------------------------------|------------------------------|------------------|----------------------|------------------------------------------|-----|
| Ag nanoparticles on GDL Sigracet 39BC   | n/a                          | 3.1              | 87                   | 556.7                                    | 15  |
| Ag nanoparticles on GDL Sigracet 35BC   | n/a                          | 3                | 95                   | 200                                      | 16  |
| Ag nanoparticles GDE                    | n/a                          | 3                | 97.5                 | 120                                      | 17  |
| Ag nanoparticles on GDL Sigracet 35BC   | n/a                          | 3                | 98                   | 200                                      | 17  |
| Ag nanoparticles on GDL Sigracet 35BC   | n/a                          | 3.1              | 95                   | 400                                      | 17  |
| Ag nanoparticles on GDL Sigracet 35BC   | n/a                          | 3.3              | 96                   | 600                                      | 17  |
| Au/C AvCard GDS3250                     |                              | 3                | 85                   | 500                                      | 18  |
| 100 nm Ag on Sigracet 39BC              | -0.45                        | 3.4              | 81.5                 | 300                                      | 19  |
| Ag nanoparticles/MWCNT on Sigracet 35BC | -0.72                        | 3                | 95                   | 340                                      | 20  |

## Supplementary note 2

### Sequential route

The flow diagram of the sequential route is shown in Supplementary Figure 2.

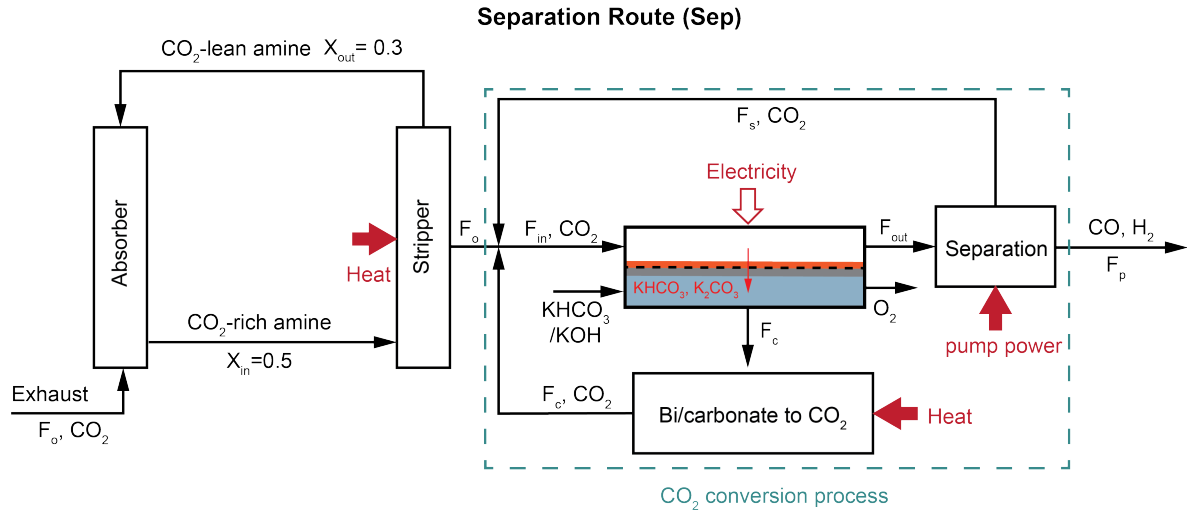

**Supplementary Figure 2 A flow diagram of separation of CO<sub>2</sub> capture and electrolysis process to produce CO.**

Key assumptions

The following are the key assumptions for the carbon balance.

*CO<sub>2</sub> electrolysis process*

- The electrolysis cell voltage is 3 V with a CO Faradaic efficiency of 90%. This assumption can be validated by Supplementary Table 3.
- We assumed the gas-fed electrolyser has a 50% CO<sub>2</sub> utilisation efficiency, meaning for 1 mol CO<sub>2</sub> conversion to CO, 1 mol CO<sub>2</sub> would be lost in the formation of (bi)carbonate. The CO<sub>2</sub> loss in (bi)carbonate is due to the high local pH at the catalyst surface, which leads to the homogenous reactions between OH<sup>-</sup> and CO<sub>2</sub>. (see reactions (7) – (9)) This phenomenon has been reported in recent literatures.<sup>21</sup> Although this critical issue can be addressed by introducing protons close to the catalyst surface (e.g., using acidic catholyte,<sup>22,23</sup> cation-exchange membrane,<sup>24</sup> and bipolar membrane<sup>25</sup>), in this work we chose the widely reported CO<sub>2</sub> electrolyser containing alkaline catholytes (e.g., KOH) or based on membrane-electrode assemblies in the sequential route.

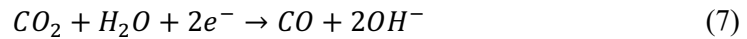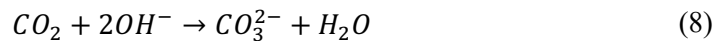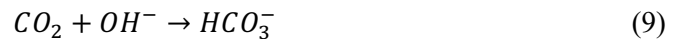

- The formed (bi)carbonate does not evolve CO<sub>2</sub> in the electrolyser. There are studies reporting the detection of CO<sub>2</sub> from the anode chamber likely due to the acidification at the anode, but such process will cause increased anode overpotential. For simplicity, we assumed all the formed (bi)carbonates will be regenerated in the regeneration unit downstream.

- The formed (bi)carbonates will be regenerated to become CO<sub>2</sub> for electrolysis. The energy for the regeneration is assumed to be 254 kJ mol<sup>-1</sup>, including 231 kJ mol<sup>-1</sup> heat duty and 23 kJ mol<sup>-1</sup> electricity.<sup>21,26</sup>
- The product of CO<sub>2</sub> conversion is the mixture of CO and H<sub>2</sub>, which can be the feedstock for the manufacturing processes such as syngas in the Fischer-Tropsch process.
- The electrolyser has a single-pass overall CO<sub>2</sub> conversion rate of 50 %, meaning that 25 mol% of CO product and 25 mol% of (bi)carbonate formation.

#### *Amine scrubbing unit*

- This work limits the scope to the traditional monoethanolamine-based scrubbing process due to the widely reported data and demonstration of pilot plants in the past decades.<sup>27-32</sup>
- The amine scrubbing unit for the downstream separation requires similar energy to recover CO<sub>2</sub> from amine solutions.
- The CO<sub>2</sub> loading in the CO<sub>2</sub>-rich amine stream from the absorption column is 0.5 mol CO<sub>2</sub> per mol amine, and the CO<sub>2</sub>-lean stream contains 0.3 mol per mol amine.<sup>33,34</sup>
- The heat duty to separate CO<sub>2</sub> from amine solutions in the stripper is between 88 – 203 kJ mol<sup>-1</sup> if there is heat integration in the process.<sup>30,32,35,36</sup> The baseline is assumed to be 179 kJ mol<sub>CO<sub>2</sub></sub><sup>-1</sup> to reflect a higher TRL proof of concept.
- Compression of the CO<sub>2</sub> after CO<sub>2</sub> recovery requires 14 - 19 kJ mol<sup>-1</sup>.

#### *Overall process*

- A pressure swing adsorption process is assumed to separate CO<sub>2</sub> from the electrolyser cathode gas effluent because the pressure-swing adsorption only requires 14.5 – 36.4 kJ per mol CO<sub>2</sub>.<sup>37-39</sup>
- This work is only focused on evaluating the dominant energies involved in this sequential route, which includes the heat to regenerate the amine, the heat for electrolyser gas product separation, and electrical energy for the CO<sub>2</sub> conversion. Other energies required for pump, compressor, cooling and hot water utilities are not considered in our model.
- The thermal energy price is assumed to be \$2.69 per million British Thermal Units<sup>40</sup>, and the electricity price is assumed to be \$0.04 per KWh.<sup>41</sup>

#### Carbon balance

$$F_{in} - F_{out} - F_c = 0 \quad (10)$$

$$F_{in} = F_o + F_s + F_c \quad (11)$$



$$F_{out} = F_s + F_p \quad (12)$$

We assumed the single pass conversion  $x$  of CO<sub>2</sub> in the electrolyser is 0.5, so  $F_{in}$  and  $F_s$  indicate the CO<sub>2</sub> inlet and outlet flow rates, respectively. Therefore, the CO<sub>2</sub> balance is:

$$F_{in} - F_s = F_{in}x \quad (13)$$

We assumed that the overall process is at steady state and all the CO<sub>2</sub> captured are converted to CO.

$$F_o = F_p \quad (14)$$

The CO<sub>2</sub> utilisation efficiency is assumed to 50%, so the carbonation rate and CO production rate is same.

$$F_c = F_p \quad (15)$$

Combining Eq. 2-1, 2-4, 2-5, 2-6 yields the influent flow rate:

$$F_{in} = \frac{2F_o}{x} \quad (16)$$

Combining Eq. 2-4 and 2-7 yields the CO<sub>2</sub> recovery rate from separation process.

$$F_s = 2F_o \left( \frac{1}{x} - 1 \right) \quad (17)$$

### Energy analysis

Energy for amine regeneration and CO<sub>2</sub> recovery:

$$Q_{ar} = Q_{sar} \times \frac{F_o}{F_o} \quad (18)$$

$$Q_{psa} = Q_{sspa} \times \frac{F_s}{F_o} \quad (19)$$

The equivalent work for the amine regeneration can be calculated from:

$$W_{ar} = \epsilon_{turbine} \times \frac{T_{stm} - T_{sink}}{T_{stm}} \times Q_{ar} \quad (20)$$

Because of  $F_c = F_o$  in our assumption, the energy to recover one molar CO<sub>2</sub> from the (bi)carbonate is:

$$Q_c = Q_{sc} \times \frac{F_c}{F_o} \quad (21)$$

Energy required for CO<sub>2</sub> electrolysis:

$$Q_e = \frac{E \times j}{j \times FE / (z \times F)} \times \frac{F_o}{F_o} \quad (22)$$

Energy required for product separation:

$$Q_{psa} = Q_{spsa} \times \frac{F_s}{F_o} \quad (23)$$

The sum of the key energies for the sequential route is:

$$Q_{sequential} = Q_{ar} + Q_{compression} + Q_c + Q_e + Q_{psa} \quad (24)$$

If there is no carbonate formation, then the conversion rate  $x$  is the conversion rate of CO<sub>2</sub> to CO product. There are following changes in calculating  $F_s$  and  $Q_{sep}$ .

$$F_s = F_o \left( \frac{1}{x} - 1 \right) \quad (25)$$

$$Q_{psa} = Q_{spsa} \times \frac{F_s}{F_o} \quad (26)$$

$$Q_{sequential} = Q_{ar} + Q_{compression} + Q_e + Q_{psa} \quad (27)$$

## Integrated route

The flow diagram of the integrated route is shown in Supplementary Figure 3.

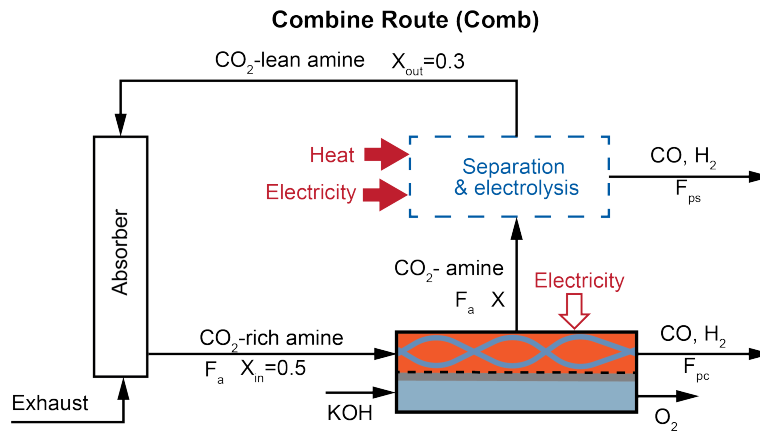

**Supplementary Figure 3 A schematic flow diagram for the integrated route between CO<sub>2</sub> capture and electrolysis.**

## Key assumptions

We made a few assumptions as follows to simplify our calculations.

### Electrolyser

- The electrolyser directly reduces CO<sub>2</sub>-rich amine stream from the absorber to CO gas product.

- There is no carbonate formation in the electrolyser because there are no gaseous CO<sub>2</sub> in the electrolyser to react with OH<sup>-</sup>.
- Considering the mass transfer limitations, we assume the electrolyser can only achieve a CO<sub>2</sub> loading of X in the effluent of the electrolyser.
- The amine solution is stable during electrolysis. Lee et al.<sup>9</sup> recently demonstrated the ability of amine recycling after CO<sub>2</sub> electrolysis.

### *Separation*

- To maintain the same CO<sub>2</sub> loading in the amine solutions, a separation and electrolysis process was included. This process includes amine regenerations, CO<sub>2</sub> gas-fed flow-cell electrolyzer, carbonate regeneration, and downstream separation process. This process simplifies our model to estimate the maximum energy penalty due to a higher X than X<sub>out</sub>.

### *Amine absorption unit*

- We assumed both separation and integrated routes have the same absorption unit in the capture process.

### Carbon balance

The following equation calculates the flow rate of CO<sub>2</sub> in amine solution that is converted in the CO<sub>2</sub> electrolyser.

$$F_{pc} = F_a \times (X - X_{in}) \quad (28)$$

The flow rate of the rest CO<sub>2</sub> to the separation & electrolysis process is

$$F_{ps} = F_a \times (X - X_{out}) \quad (29)$$

### Energy analysis

The energy required to convert one mole CO<sub>2</sub> in the amine solutions in the integrated electrolysis:

$$Q_{e\_integrated} = \frac{F_a}{F_a} \times \frac{X_{in} - X}{X_{in} - X_{out}} \times \frac{E_{integrated} \times j}{j \times FE_{integrated} / (z \times F)} \quad (30)$$

The energy required to capture and convert the CO<sub>2</sub> in the normal electrolyser in the separation & electrolysis process:

$$Q_{e\_integrated\_s} = \frac{F_a}{F_a} \times \frac{X - X_{out}}{X_{in} - X_{out}} \times \frac{E \times j}{j \times FE / (z \times F)} \quad (31)$$

The energy required for amine regeneration in the overall process is:

$$Q_{ar\_integrated} = \frac{F_a}{F_a} \times Q_{sar} + Q_{ar} \times \frac{F_a}{F_a} \times \frac{X - X_{out}}{X_{in} - X_{out}} \quad (32)$$

The energy required for (bi)carbonate regeneration process is:

$$Q_{c\_integrated} = \frac{F_a}{F_a} \times \frac{X - X_{out}}{X_{in} - X_{out}} \times Q_c \quad (33)$$

The sum of the key energies for the integrated route is:

$$Q_{integrated} = Q_{ecomb} + Q_{ecombs} + Q_{arcomb} + Q_{ccomb} \quad (34)$$

Supplementary Table 4 lists all the variables used in the carbon balance and energy analysis.

The energy cost can be calculated by:

$$Cost_{thermal} = Q_{thermal} \times \frac{p_{thermal}}{10^6} / 1.055 \quad (35)$$

$$Cost_{electricity} = Q_{electricity} \times \frac{p_{electricity}}{3600 \times 44} \times 10^6 \quad (36)$$

#### Supplementary Table 4 Summary of the variables and their definitions

| Symbol    | Definition                                                                        | Values or unit                                                                            |
|-----------|-----------------------------------------------------------------------------------|-------------------------------------------------------------------------------------------|
| $F_{in}$  | Influent of the electrolyser                                                      | mol CO <sub>2</sub> h <sup>-1</sup>                                                       |
| $F_{out}$ | Effluent of the electrolyser                                                      | mol C h <sup>-1</sup> , should include flow rates of CO <sub>2</sub> and CO in the stream |
| $R$       | The total reaction rate in the electrolyser                                       | mol CO <sub>2</sub> h <sup>-1</sup>                                                       |
| $F_c$     | The rate of (bi)carbonate formation                                               | mol CO <sub>2</sub> h <sup>-1</sup>                                                       |
| $F_s$     | The flow rate of CO <sub>2</sub> recovered from the downstream separation process | mol CO <sub>2</sub> h <sup>-1</sup>                                                       |
| $F_p$     | The production rate of the CO product                                             | mol CO <sub>2</sub> h <sup>-1</sup>                                                       |

|                   |                                                                                                                      |                                                                                                                                                              |
|-------------------|----------------------------------------------------------------------------------------------------------------------|--------------------------------------------------------------------------------------------------------------------------------------------------------------|
| $F_o$             | The flow rate of CO <sub>2</sub> from the stripper unit                                                              | mol CO <sub>2</sub> h <sup>-1</sup>                                                                                                                          |
| $x$               | Single-pass conversion rate of the electrolyser                                                                      | We assumed to be 0.5, meaning that 0.25 for CO <sub>2</sub> to CO, and 0.25 for CO <sub>2</sub> to (bi)carbonate                                             |
| $F_{ar}$          | The total flow rate of CO <sub>2</sub> recovered from the amine regeneration                                         | mol CO <sub>2</sub> h <sup>-1</sup>                                                                                                                          |
| $Q_{ar}$          | Total energy required for amine regeneration including heat integration                                              | We assumed the range is at 88 – 203 kJ per mol CO <sub>2</sub> . The baseline value is 179 kJ per mol CO <sub>2</sub> to reflect higher TRL proof of concept |
| $Q_{sar}$         | Specific energy required to recover 1 mol CO <sub>2</sub> from amine regeneration                                    | kJ per mol CO <sub>2</sub>                                                                                                                                   |
| $Q_{psa}$         | The energy required to recover CO <sub>2</sub> from the product stream using pressure swing adsorption               | kJ per mol CO <sub>2</sub>                                                                                                                                   |
| $Q_{compression}$ | The energy required to compress CO <sub>2</sub> after recovery                                                       | We assumed the range is at 14 – 19 kJ per mol CO <sub>2</sub> . The baseline value is chosen as 16.5 kJ per mol CO <sub>2</sub> .                            |
| $Q_{spsa}$        | Specific energy required to recover one mole CO <sub>2</sub> from the product stream using pressure swing adsorption | We assumed the range is at 14.5 ~ 36.4 kJ per mol CO <sub>2</sub> . The baseline value is chosen as 25.46 kJ per mol CO <sub>2</sub> .                       |
| $Q_c$             | Total energy required to recover CO <sub>2</sub> from (bi)carbonate                                                  | We assumed the baseline value is at 254 kJ per mol CO <sub>2</sub> .                                                                                         |
| $Q_{sc}$          | Energy to recover 1 mol CO <sub>2</sub> from (bi)carbonate                                                           | kJ per mol CO <sub>2</sub>                                                                                                                                   |
| $Q_e$             | Energy required to convert 1 mol CO <sub>2</sub> in MEA-based electrolyser                                           | kJ per mol CO <sub>2</sub>                                                                                                                                   |
| $z$               | The number of charges transferred to convert 1 CO <sub>2</sub> molecule to CO molecule.                              | $z = 2$ for CO production                                                                                                                                    |
| $F$               | Faraday constant                                                                                                     | 96485 C mol <sup>-1</sup>                                                                                                                                    |
| $j$               | Current densities of the CO <sub>2</sub> electrolyser                                                                | mA cm <sup>-2</sup>                                                                                                                                          |
| $E$               | Cell voltage                                                                                                         | V                                                                                                                                                            |
| $Q_{sequential}$  | Total energy required to convert one mole CO <sub>2</sub> in the sequential route                                    | kJ per mol CO <sub>2</sub>                                                                                                                                   |
| $X_{in}$          | The CO <sub>2</sub> loading in the effluent of the absorption unit                                                   | We assumed 0.5 mol CO <sub>2</sub> per mol amine.                                                                                                            |

|                        |                                                                                                                                |                                                                                                                                                                                              |
|------------------------|--------------------------------------------------------------------------------------------------------------------------------|----------------------------------------------------------------------------------------------------------------------------------------------------------------------------------------------|
| $X_{out}$              | The CO <sub>2</sub> loading in the CO <sub>2</sub> -lean amines.                                                               | We assumed the CO <sub>2</sub> -lean amine contains 0.3 mol CO <sub>2</sub> per mol amine.                                                                                                   |
| $F_a$                  | Molar flow rate of amine in the effluent of the absorption unit                                                                | mol amine h <sup>-1</sup>                                                                                                                                                                    |
| $F_{pc}$               | Flow rate of the CO <sub>2</sub> that is converted in the integrated electrolyser.                                             | mol CO <sub>2</sub> h <sup>-1</sup>                                                                                                                                                          |
| $X$                    | CO <sub>2</sub> loading in the effluent of the integrated electrolysis                                                         | We assumed 0.3 mol CO <sub>2</sub> per mol amine in our study as the baseline value.                                                                                                         |
| $F_{ps}$               | The flow rate of CO <sub>2</sub> that is converted in the separation & electrolysis process                                    | mol amine h <sup>-1</sup>                                                                                                                                                                    |
| $Q_{e\_integrated}$    | The energy required to convert CO <sub>2</sub> in the amine solutions to CO in the integrated electrolyser.                    | kJ per mol CO <sub>2</sub>                                                                                                                                                                   |
| $Q_{e\_integrated\_s}$ | The energy required to convert CO <sub>2</sub> to CO in CO <sub>2</sub> electrolyser in the separation & electrolysis process. | kJ per mol CO <sub>2</sub>                                                                                                                                                                   |
| $Q_{ar\_integrated}$   | The energy required to recover CO <sub>2</sub> from the amine solutions in the integrated route.                               | kJ per mol CO <sub>2</sub>                                                                                                                                                                   |
| $Q_{c\_integrated}$    | The energy required to recover CO <sub>2</sub> from (bi)carbonates in the integrated route.                                    | kJ per mol CO <sub>2</sub>                                                                                                                                                                   |
| $Q_{integrated}$       | The sum of key energies in the integrated route.                                                                               | kJ per mol CO <sub>2</sub>                                                                                                                                                                   |
| $Cost_{thermal}$       | The energy cost associated with thermal energy consumption                                                                     | \$ tonCO <sub>2</sub> <sup>-1</sup>                                                                                                                                                          |
| $Q_{thermal}$          | Thermal energy requirement for the process.                                                                                    | kJ molCO <sub>2</sub> <sup>-1</sup> , the thermal energy is associated with amine regeneration in the CO <sub>2</sub> capture step and calcination step in the (bi)carbonate regeneration.   |
| $p_{thermal}$          | The price of the thermal energy.                                                                                               | We assumed the price of thermal energy from natural gas is \$2.69 per million British thermal units. <sup>40</sup> The current price is unusually higher due to the Russia-Ukraine conflict. |
| $Cost_{electricity}$   | The energy cost associated with the electricity.                                                                               | \$ tonCO <sub>2</sub> <sup>-1</sup>                                                                                                                                                          |
| $Q_{electricity}$      | The energy requirement associated with the electric work.                                                                      | kJ molCO <sub>2</sub> <sup>-1</sup> se electric energy associated with compressor, PSA separation, electrolysis, and (bi)carbonate regeneration.                                             |

|                          |                               |                                                                      |
|--------------------------|-------------------------------|----------------------------------------------------------------------|
| $p_{\text{electricity}}$ | The price of the electricity. | The electricity price is assumed to be \$0.04 per kWh. <sup>41</sup> |
|--------------------------|-------------------------------|----------------------------------------------------------------------|

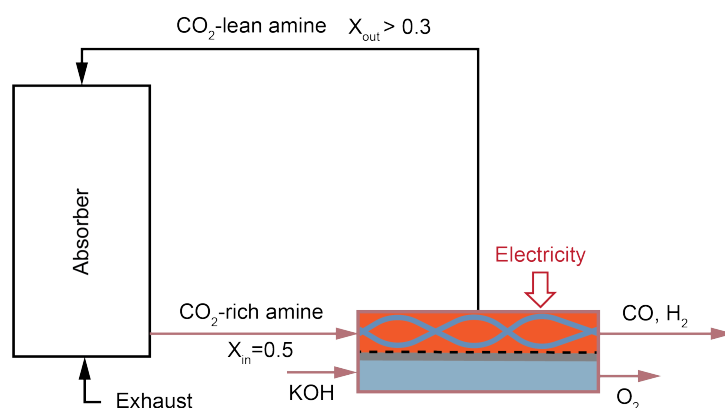

**Supplementary Figure 4** A schematic illustration of the integrated route that requires a sizeable absorber to account for the incomplete conversion in the integrated electrolysis system.

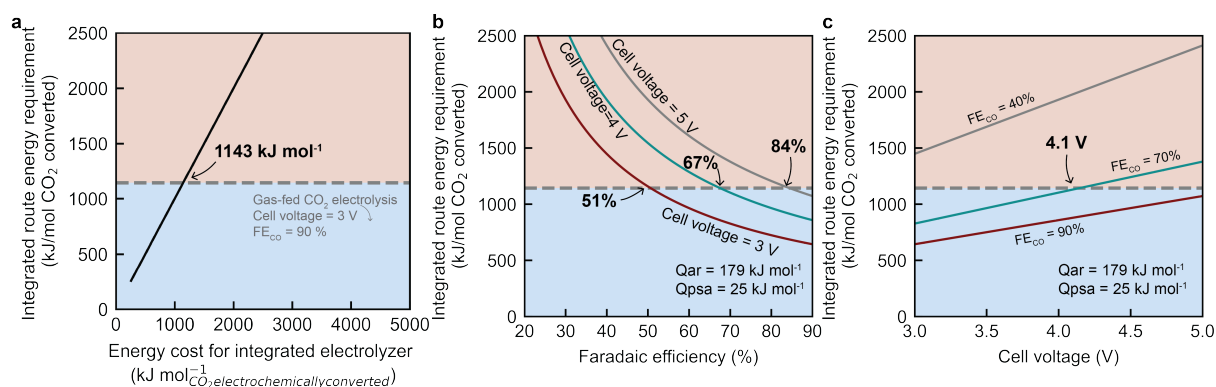

**Supplementary Figure 5** Impacts on overall integrated energy cost from integrated electrolyzers.

**a**, Effect of energy cost **b**, CO FE at a cell voltage at 3, 4, and 5 V and **c**, cell voltages with CO Faradaic efficiency (FE) of 40%, 70%, and 90% on the overall energy cost of the integrated route. The grey dashed line represents the energy cost of the sequential route based on state-of-the-art gas-fed CO<sub>2</sub> electrolyzers. The blue region means that the integrated route is more energy-efficient than the sequential route.

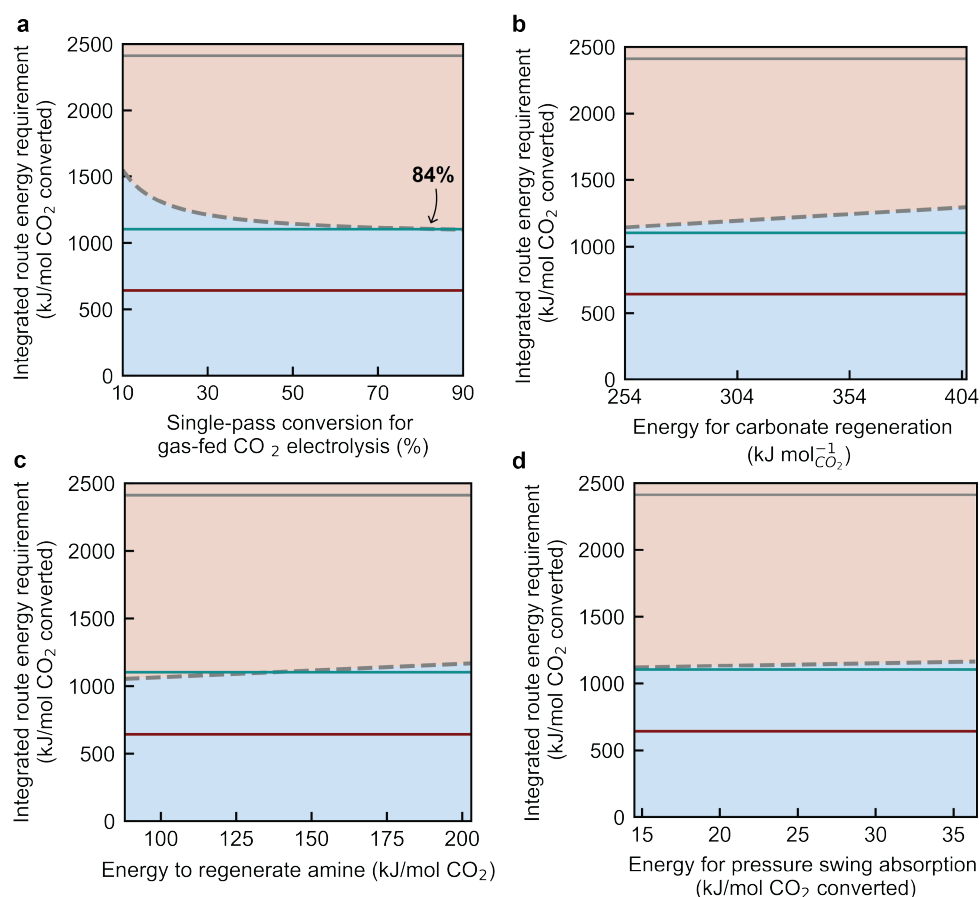

**Supplementary Figure 6 Effects of operating conditions and solvent properties on the overall energy costs of the sequential and integrated route.** The overall energy cost of the sequential route and integrated route as a function of **a**, single-pass conversion for gas-fed CO<sub>2</sub> electrolysis (note that the single-pass conversion is the ratio of total CO<sub>2</sub> consumed vs. the CO<sub>2</sub> feed), **b**, CO<sub>2</sub> loading in the effluent of the integrated electrolyser from capture media in the sequential route, **c**, energy required to regenerate amine-based capture medium with heat integration included, and **d**, the energy required to separate product from the effluent stream of gas-fed CO<sub>2</sub> electrolysers. The figures show baseline (green), pessimistic (grey), and optimistic (red) scenarios of the integrated route. The blue region is where the integrated route has energy advantages, while the orange region is vice versa.



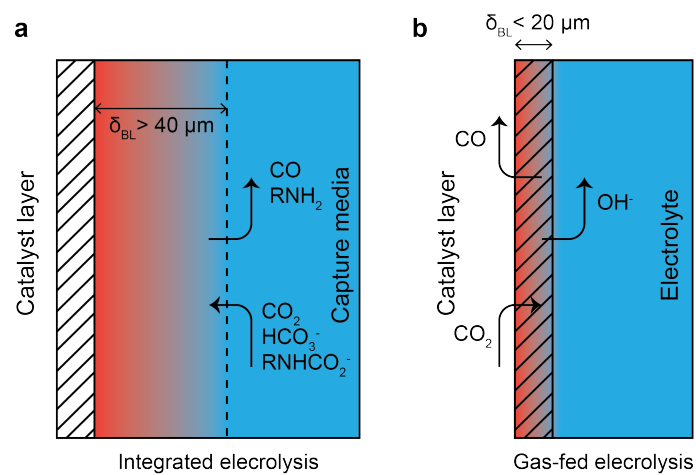

**Supplementary Figure 7 Comparison of the thickness of hydrodynamic boundary layers ( $\delta_{BL}$ ) at the cathode for (a) integrated electrolysis if the cell configuration is similar to gas-fed H-cell and (b) gas-fed electrolysis.**

## References

- 1 McCallum, C. *et al.* Reducing the crossover of carbonate and liquid products during carbon dioxide electroreduction. *Cell Reports Physical Science* **2**, 100522, doi:<https://doi.org/10.1016/j.xcrp.2021.100522> (2021).
- 2 Weng, L.-C., Bell, A. T. & Weber, A. Z. Towards membrane-electrode assembly systems for CO<sub>2</sub> reduction: a modeling study. *Energy & Environmental Science* **12**, 1950-1968, doi:10.1039/C9EE00909D (2019).
- 3 Kuo, D.-Y. *et al.* Influence of Surface Adsorption on the Oxygen Evolution Reaction on IrO<sub>2</sub>(110). *Journal of the American Chemical Society* **139**, 3473-3479, doi:10.1021/jacs.6b11932 (2017).
- 4 Nurlaela, E., Shinagawa, T., Qureshi, M., Dhawale, D. S. & Takanabe, K. Temperature Dependence of Electrocatalytic and Photocatalytic Oxygen Evolution Reaction Rates Using NiFe Oxide. *ACS Catalysis* **6**, 1713-1722, doi:10.1021/acscatal.5b02804 (2016).
- 5 Giordano, L. *et al.* pH dependence of OER activity of oxides: Current and future perspectives. *Catalysis Today* **262**, 2-10, doi:<https://doi.org/10.1016/j.cattod.2015.10.006> (2016).
- 6 Han, S.-J. & Wee, J.-H. Estimation of the Amount of CO<sub>2</sub> Absorbed by Measuring the Variation of Electrical Conductivity in Highly Concentrated Monoethanolamine Solvent Systems. *Journal of Chemical & Engineering Data* **61**, 712-720, doi:10.1021/acs.jced.5b00178 (2016).
- 7 Gilliam, R. J., Graydon, J. W., Kirk, D. W. & Thorpe, S. J. A review of specific conductivities of potassium hydroxide solutions for various concentrations and temperatures. *International Journal of Hydrogen Energy* **32**, 359-364, doi:<https://doi.org/10.1016/j.ijhydene.2006.10.062> (2007).
- 8 Liu, L., Chen, W. & Li, Y. An overview of the proton conductivity of nafion membranes through a statistical analysis. *Journal of Membrane Science* **504**, 1-9, doi:<https://doi.org/10.1016/j.memsci.2015.12.065> (2016).
- 9 Lee, G. *et al.* Electrochemical upgrade of CO<sub>2</sub> from amine capture solution. *Nature Energy* **6**, 46-53, doi:10.1038/s41560-020-00735-z (2021).
- 10 Chen, L. *et al.* Electrochemical Reduction of Carbon Dioxide in a Monoethanolamine Capture Medium. *ChemSusChem* **10**, 4109-4118, doi:<https://doi.org/10.1002/cssc.201701075> (2017).
- 11 Abdinejad, M., Mirza, Z., Zhang, X.-a. & Kraatz, H.-B. Enhanced Electrocatalytic Activity of Primary Amines for CO<sub>2</sub> Reduction Using Copper Electrodes in Aqueous Solution. *ACS Sustainable Chemistry & Engineering* **8**, 1715-1720, doi:10.1021/acssuschemeng.9b06837 (2020).
- 12 Pérez-Gallent, E., Vankani, C., Sánchez-Martínez, C., Anastasopol, A. & Goetheer, E. Integrating CO<sub>2</sub> Capture with Electrochemical Conversion Using Amine-Based Capture Solvents as Electrolytes. *Industrial & Engineering Chemistry Research* **60**, 4269-4278, doi:10.1021/acs.iecr.0c05848 (2021).
- 13 Li, L., Yang, J., Li, L., Huang, Y. & Zhao, J. Electrolytic reduction of CO<sub>2</sub> in KHCO<sub>3</sub> and alkanolamine solutions with layered double hydroxides intercalated with gold or copper. *Electrochimica Acta* **402**, 139523, doi:<https://doi.org/10.1016/j.electacta.2021.139523> (2022).
- 14 Ahmad, N. *et al.* Electrochemical CO<sub>2</sub> reduction to CO facilitated by MDEA-based deep eutectic solvent in aqueous solution. *Renewable Energy* **177**, 23-33, doi:<https://doi.org/10.1016/j.renene.2021.05.106> (2021).
- 15 Endrődi, B. *et al.* Operando cathode activation with alkali metal cations for high current density operation of water-fed zero-gap carbon dioxide electrolyzers. *Nature Energy* **6**, 439-448, doi:10.1038/s41560-021-00813-w (2021).
- 16 Kutz, R. B. *et al.* Sustainion Imidazolium-Functionalized Polymers for Carbon Dioxide Electrolysis. *Energy Technology* **5**, 929-936, doi:<https://doi.org/10.1002/ente.201600636> (2017).
- 17 Kaczur, J. J., Yang, H., Liu, Z., Sajjad, S. D. & Masel, R. I. Carbon Dioxide and Water Electrolysis Using New Alkaline Stable Anion Membranes. *Frontiers in Chemistry* **6**, doi:10.3389/fchem.2018.00263 (2018).

- 18 Yin, Z. *et al.* An alkaline polymer electrolyte CO<sub>2</sub> electrolyzer operated with pure water. *Energy & Environmental Science* **12**, 2455-2462, doi:10.1039/C9EE01204D (2019).
- 19 Gabardo, C. M. *et al.* Combined high alkalinity and pressurization enable efficient CO<sub>2</sub> electroreduction to CO. *Energy & Environmental Science* **11**, 2531-2539, doi:10.1039/C8EE01684D (2018).
- 20 Ma, S. *et al.* Carbon nanotube containing Ag catalyst layers for efficient and selective reduction of carbon dioxide. *Journal of Materials Chemistry A* **4**, 8573-8578, doi:10.1039/C6TA00427J (2016).
- 21 Rabinowitz, J. A. & Kanan, M. W. The future of low-temperature carbon dioxide electrolysis depends on solving one basic problem. *Nature Communications* **11**, 5231, doi:10.1038/s41467-020-19135-8 (2020).
- 22 Huang, J. E. *et al.* CO<sub>2</sub> electrolysis to multicarbon products in strong acid. *Science* **372**, 1074-1078, doi:10.1126/science.abg6582 (2021).
- 23 Monteiro, M. C. O., Philips, M. F., Schouten, K. J. P. & Koper, M. T. M. Efficiency and selectivity of CO<sub>2</sub> reduction to CO on gold gas diffusion electrodes in acidic media. *Nature Communications* **12**, 4943, doi:10.1038/s41467-021-24936-6 (2021).
- 24 O'Brien, C. P. *et al.* Single Pass CO<sub>2</sub> Conversion Exceeding 85% in the Electrosynthesis of Multicarbon Products via Local CO<sub>2</sub> Regeneration. *ACS Energy Letters* **6**, 2952-2959, doi:10.1021/acenergylett.1c01122 (2021).
- 25 Pătru, A., Bininger, T., Pribyl, B. & Schmidt, T. J. Design Principles of Bipolar Electrochemical Co-Electrolysis Cells for Efficient Reduction of Carbon Dioxide from Gas Phase at Low Temperature. *Journal of The Electrochemical Society* **166**, F34-F43, doi:10.1149/2.1221816jes (2019).
- 26 Keith, D. W., Holmes, G., St. Angelo, D. & Heidel, K. A Process for Capturing CO<sub>2</sub> from the Atmosphere. *Joule* **2**, 1573-1594, doi:<https://doi.org/10.1016/j.joule.2018.05.006> (2018).
- 27 Zhang, Y. & Chen, C.-C. Modeling CO<sub>2</sub> Absorption and Desorption by Aqueous Monoethanolamine Solution with Aspen Rate-based Model. *Energy Procedia* **37**, 1584-1596, doi:<https://doi.org/10.1016/j.egypro.2013.06.034> (2013).
- 28 Li, K. *et al.* Systematic study of aqueous monoethanolamine-based CO<sub>2</sub> capture process: model development and process improvement. *Energy Science & Engineering* **4**, 23-39, doi:<https://doi.org/10.1002/ese3.101> (2016).
- 29 House, K. Z. *et al.* Economic and energetic analysis of capturing CO<sub>2</sub> from ambient air. *Proceedings of the National Academy of Sciences* **108**, 20428-20433, doi:10.1073/pnas.1012253108 (2011).
- 30 NETL. *Carbon Dioxide Capture Handbook*. (U.S. Department of Energy, 2015).
- 31 Metz, B., Davidson, O., Conick, H. d., Loos, M. & Meyer, L. *IPCC Special Report on Carbon Dioxide Capture and Storage*. (2005).
- 32 Feron, P. *et al.* Amine Based Post-combustion Capture Technology Advancement for Application in Chinese Coal Fired Power Stations. *Energy Procedia* **63**, 1399-1406, doi:<https://doi.org/10.1016/j.egypro.2014.11.149> (2014).
- 33 Fan, G.-j., Wee, A. G. H., Idem, R. & Tontiwachwuthikul, P. NMR Studies of Amine Species in MEA-CO<sub>2</sub>-H<sub>2</sub>O System: Modification of the Model of Vapor-Liquid Equilibrium (VLE). *Industrial & Engineering Chemistry Research* **48**, 2717-2720, doi:10.1021/ie8015895 (2009).
- 34 Simoes, M. C., Hughes, K. J., Ingham, D. B., Ma, L. & Pourkashanian, M. Predicting Speciation of Ammonia, Monoethanolamine, and Diethanolamine Using Only Ionic Radius and Ionic Charge. *Industrial & Engineering Chemistry Research* **57**, 2346-2352, doi:10.1021/acs.iecr.7b04250 (2018).
- 35 Team, T. I. E. C. M. Amine-based Post-Combustion CO<sub>2</sub> Capture. (Department of Engineering and Public Policy, Carnegie Mellon University, Pittsburgh, PA 15213, 2019).
- 36 Gjernes, E. *et al.* Results from 30 wt% MEA Performance Testing at the CO<sub>2</sub> Technology Centre Mongstad. *Energy Procedia* **114**, 1146-1157, doi:<https://doi.org/10.1016/j.egypro.2017.03.1276> (2017).
- 37 Riboldi, L. & Bolland, O. Overview on Pressure Swing Adsorption (PSA) as CO<sub>2</sub> Capture Technology: State-of-the-Art, Limits and Potentials. *Energy Procedia* **114**, 2390-2400, doi:<https://doi.org/10.1016/j.egypro.2017.03.1385> (2017).

- 38 Siqueira, R. M. *et al.* Carbon Dioxide Capture by Pressure Swing Adsorption. *Energy Procedia* **114**, 2182-2192, doi:<https://doi.org/10.1016/j.egypro.2017.03.1355> (2017).
- 39 Shah, G., Ahmad, E., Pant, K. K. & Vijay, V. K. Comprehending the contemporary state of art in biogas enrichment and CO<sub>2</sub> capture technologies via swing adsorption. *International Journal of Hydrogen Energy* **46**, 6588-6612, doi:<https://doi.org/10.1016/j.ijhydene.2020.11.116> (2021).
- 40 mundi, i. *Henry Hub Natural Gas Futures End of Day Settlement Price*, <<https://www.indexmundi.com/commodities/?commodity=natural-gas&months=60>> (2022).
- 41 Yue, P. *et al.* Life cycle and economic analysis of chemicals production via electrolytic (bi)carbonate and gaseous CO<sub>2</sub> conversion. *Applied Energy* **304**, 117768, doi:<https://doi.org/10.1016/j.apenergy.2021.117768> (2021).
